# Supplementary material for: Facile synthesis of MOF-5 confined in SBA-15 hybrid material with enhanced hydrostability
Source: Royal Society of Chemistry journal article supplement (doi:10.1039/c2cc38366g), 2012-12-18
Supplement: c2cc38366g.pdf [file c2cc38366g.pdf]

Facile Synthesis of MOF-5 Confined in SBA-15 Hybrid Material for Enhanced  
Hydrostability

Chia-Ming Wu, Monika Rathi, Phil Ahrenkiel, Ranjit T. Koodali\* and Zhenqiang Wang\*

# Supporting Information

# Content

Section 1 Detailed synthesis of MOF hybrid materials

Section 2 Powder XRD patterns of MOF-5 and SBA-15

Section 3 TGA measurements of MOF-5, SBA-15, and MOF-SBA-15

Section 4 FTIR spectra of MOF-5, SBA-15, and MOF-SBA-15

Section 5 Estimation of MOF-5 loading in MOF-5-SBA-15 hybrid materials based on TGA measurements

## Section 1 Detailed synthesis of MOF hybrid materials

**Chemicals for synthesis:** 1, 4-Benzenedicarboxylic acid (1,4-BDC), *N, N*-Diethylformamide (DEF),  $\text{Zn}(\text{NO}_3)_2 \cdot 6\text{H}_2\text{O}$ , amphiphilic triblock copolymer, poly(ethylene glycol)-*block*-poly(propylene glycol)- *block*-poly(ethylene glycol) with average molecular weight 5800 (P123), and tetraethyl orthosilicate (TEOS). All starting materials were received from commercial sources and used without further purification.

**Synthesis of MOF-5:** The synthesis of MOF-5 was based on the procedure reported by Yaghi and co-workers.<sup>1</sup> Typically, 360 mg (1.21 mmol) of  $\text{Zn}(\text{NO}_3)_2 \cdot 6\text{H}_2\text{O}$  and 66 mg (0.40mmol) of 1,4-BDC were dissolved in 10 mL DEF solvent in a 20-mL scintillation vial. The mixture was then kept at 100 °C for 12 hours for the formation of MOF-5 crystals. Upon cooling, the crystals were obtained by filtration and washed several times with *N, N*-Diethylformamide (DEF). To activate the MOF-5 pores, the MOF-5 crystals were washed three times with chloroform and then soaked in chloroform for additional 24 hours. Before the surface area measurement and gas/vapor adsorption study, the MOF-5 crystals were degassed under 105 °C under ultra-high vacuum (< 6  $\mu\text{mHg}$ ) for at least 24 hours.

**Synthesis of SBA-15 materials:** The preparation of SBA-15 porous material followed previous report.<sup>2</sup> Briefly, 3.2 g of P123 polymer was dispersed in to a mixture solution of water (24g) and 2M HCl (96g). 6.8 g of TEOS was then added into the resulting solution under stirring. The TEOS solution was stirred at 40 °C for 24 hours and then underwent gelation at 100 °C for 48 hours. After the gelation, the white solid powder was obtained by filtration, washed by DI water and dried at 80 °C for overnight. The as-synthesized SBA-15 material was then calcinated in air at 550 °C for 12 hours to remove the P123 polymer.

## Section 2 Powder XRD patterns of MOF-5 and SBA-15

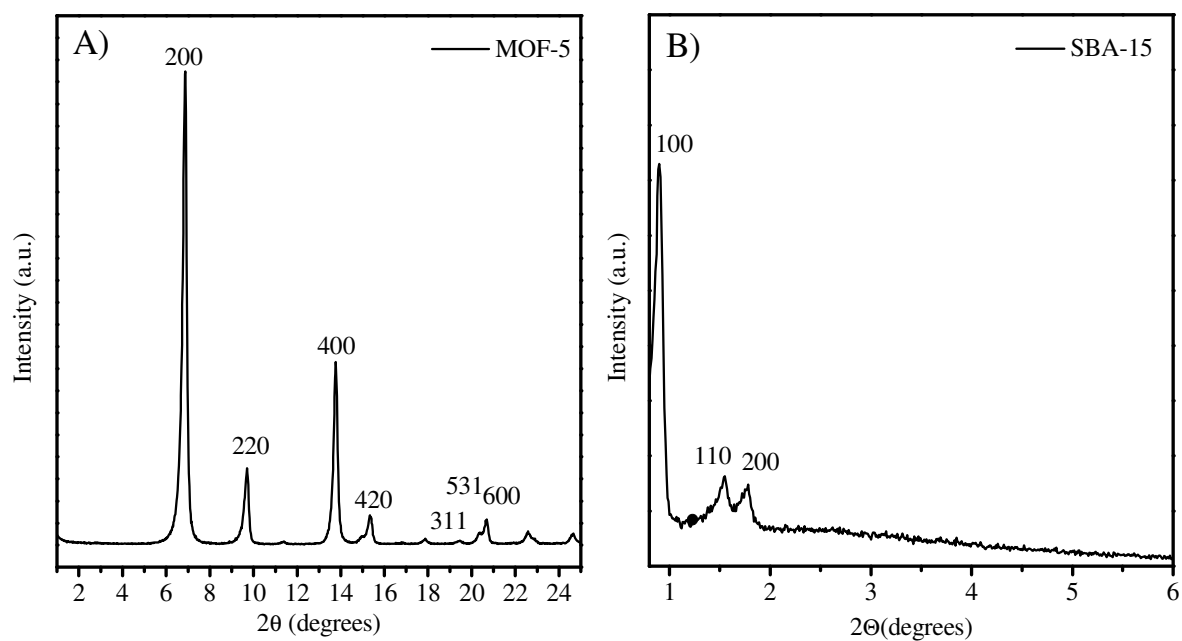

**Figure S1.** Powder-XRD patterns of (A) activated MOF-5 and (B) SBA-15.

### Section 3 TGA measurements of MOF-5, SBA-15, and MOF-5-SBA-15

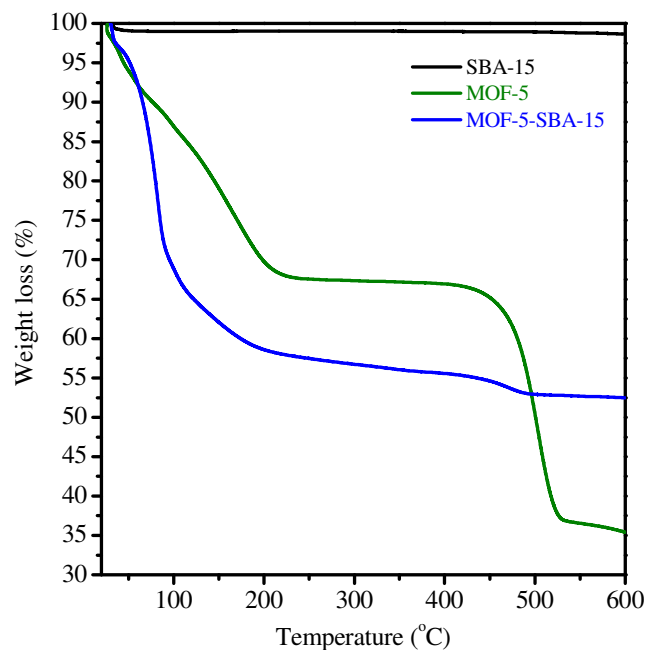

**Figure S2.** TGA patterns of SBA-15(black), as-synthesized MOF-5(green), and MOF-5-SBA-15(blue).

## Section 4 FTIR spectra of MOF-5-SBA-15, SBA-15, and MOF-5

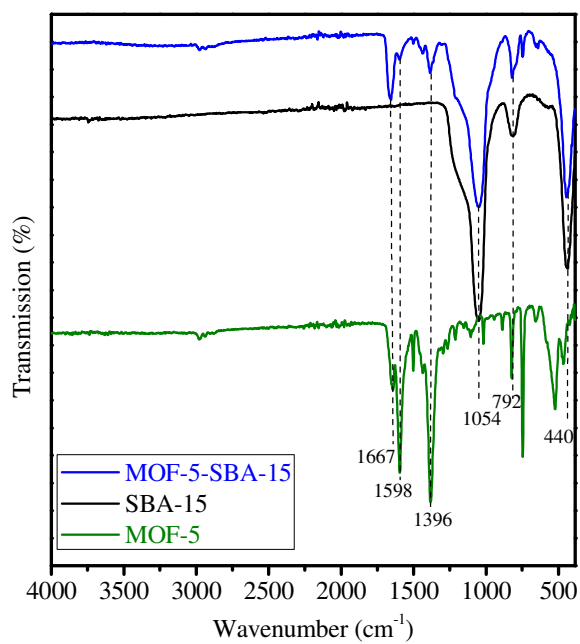

**Figure S3.** FTIR patterns of MOF-5-SBA-15(blue), SBA-15(black), and MOF-5(green) materials.

## Section 5 Estimation of MOF-5 loading in MOF-5-SBA-15 hybrid materials based on TGA measurements

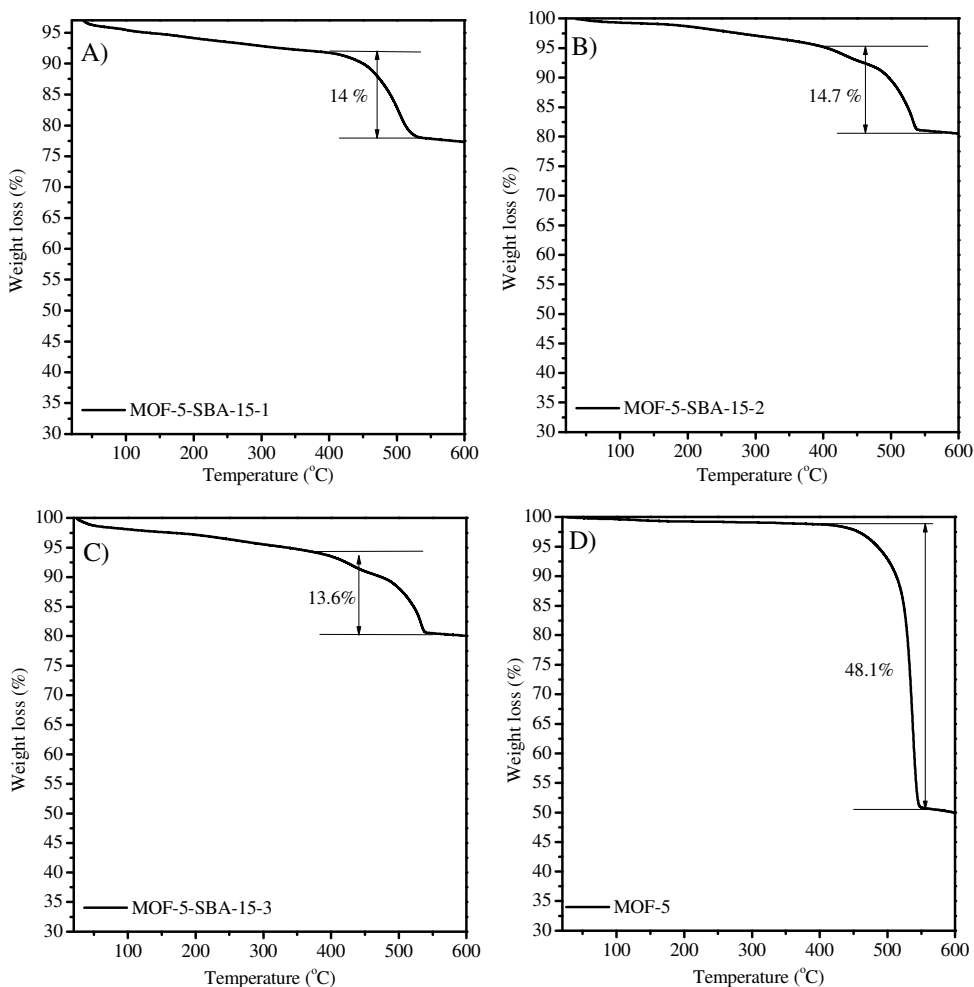

**Figure S4.** TGA measurements of dried MOF-5-SBA-15 samples in three independent trials. The loading amount of MOF-5 composition in the MOF-5-SBA-15 hybrid was estimated based on the ratio of the weight loss of dried MOF-5-SBA-15 to the weight loss of the dried MOF-5 at ~450 °C, since SBA-15 template itself shows no weight loss at this temperature range (see Figure S2). The weight loss of dried MOF-5 is 48.1 % at ~450 °C; thus, the loading of MOF-5 in dried MOF-5-SBA-15 from three different batches was estimated to be 29.1 wt% (14%/48.1%), 30.5 wt% (14.7%/48.1%), and 28.3 wt% (13.6%/48.1%), respectively, i.e., the average loading of MOF-5 is  $29.3 \pm 1.1$  wt%.

- (1) Li, H.; Eddaoudi, M.; O'Keeffe, M.; Yaghi, O. M. *Nature* **1999**, *402*, 276.
- (2) Murali, A.; Chang, Z.; Ranjit, K. T.; Krishna, R. M.; Kurshev, V.; Kevan, L. *The Journal of Physical Chemistry B* **2002**, *106*, 6913.
